# Supplementary material for: Novel Anti-Hepatitis B Virus Activity of Euphorbia schimperi and Its Quercetin and Kaempferol Derivatives
Source: PubMed Central journal article supplement — ACS Omega. 2021 Oct 21;6(43):29100–10. doi: 10.1021/acsomega.1c04320 (PMC8567387; doi:10.1021/acsomega.1c04320), 2021-10-21
Supplement: ao1c04320_si_001.pdf [file ao1c04320_si_001.pdf]

## Supporting Information for Publication

### The Novel Anti-Hepatitis B Virus Activity of *Euphorbia schimperi* and its Quercetin and Kaempferol Derivatives

Mohammad K. Parvez<sup>†\*</sup>, Sarfaraz Ahmed<sup>†</sup>, Mohammed S. Al-Dosari<sup>†</sup>, Mazin A. S. Abdelwahid<sup>\*</sup>, Ahmed H. Arbab<sup>†,‡</sup>, Adnan J. Al-Rehaily<sup>†</sup>, Mai M. Al-Oqail<sup>†</sup>

<sup>†</sup>Department of Pharmacognosy, College of Pharmacy, King Saud University, Riyadh, Saudi Arabia.

<sup>\*</sup>Department of Pharmaceutical Chemistry, Al-Neelain University, Khartoum, Sudan.

<sup>\*</sup>Graduate School of Pharmaceutical Sciences, Tohoku University, Sendai, Japan.

<sup>‡</sup>Department of Pharmacognosy, Faculty of Pharmacy, University of Khartoum, Khartoum, Sudan.

#### \*Corresponding authors:

Mohammad K. Parvez, PhD; Associate Professor  
Department of Pharmacognosy, College of Pharmacy,  
King Saud University  
Riyadh 11451, Saudi Arabia  
E-mail: khalid\_parvez@yahoo.com; mohkhalid@ksu.edu.sa

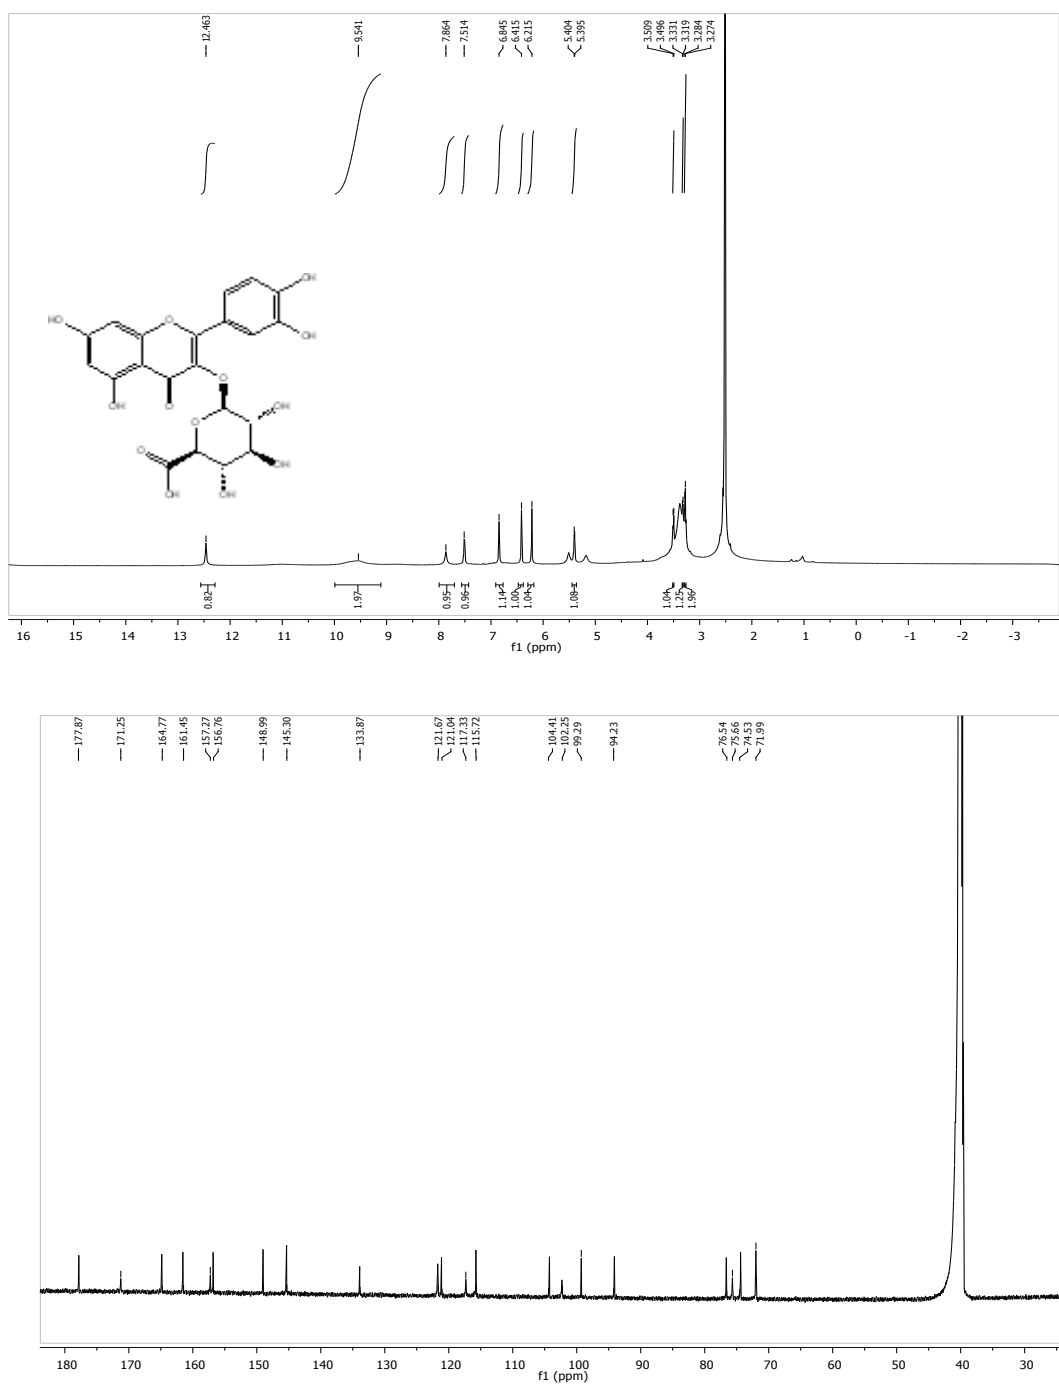

**Figure S1.** The <sup>1</sup>H NMR (700 MHz, DMSO-d<sub>6</sub>; upper panel) and <sup>13</sup>C NMR (175 MHz, DMSO-d<sub>6</sub>; lower panel) spectrum of *E. schimperi* derived quercetin 3-*O*-glucuronide.

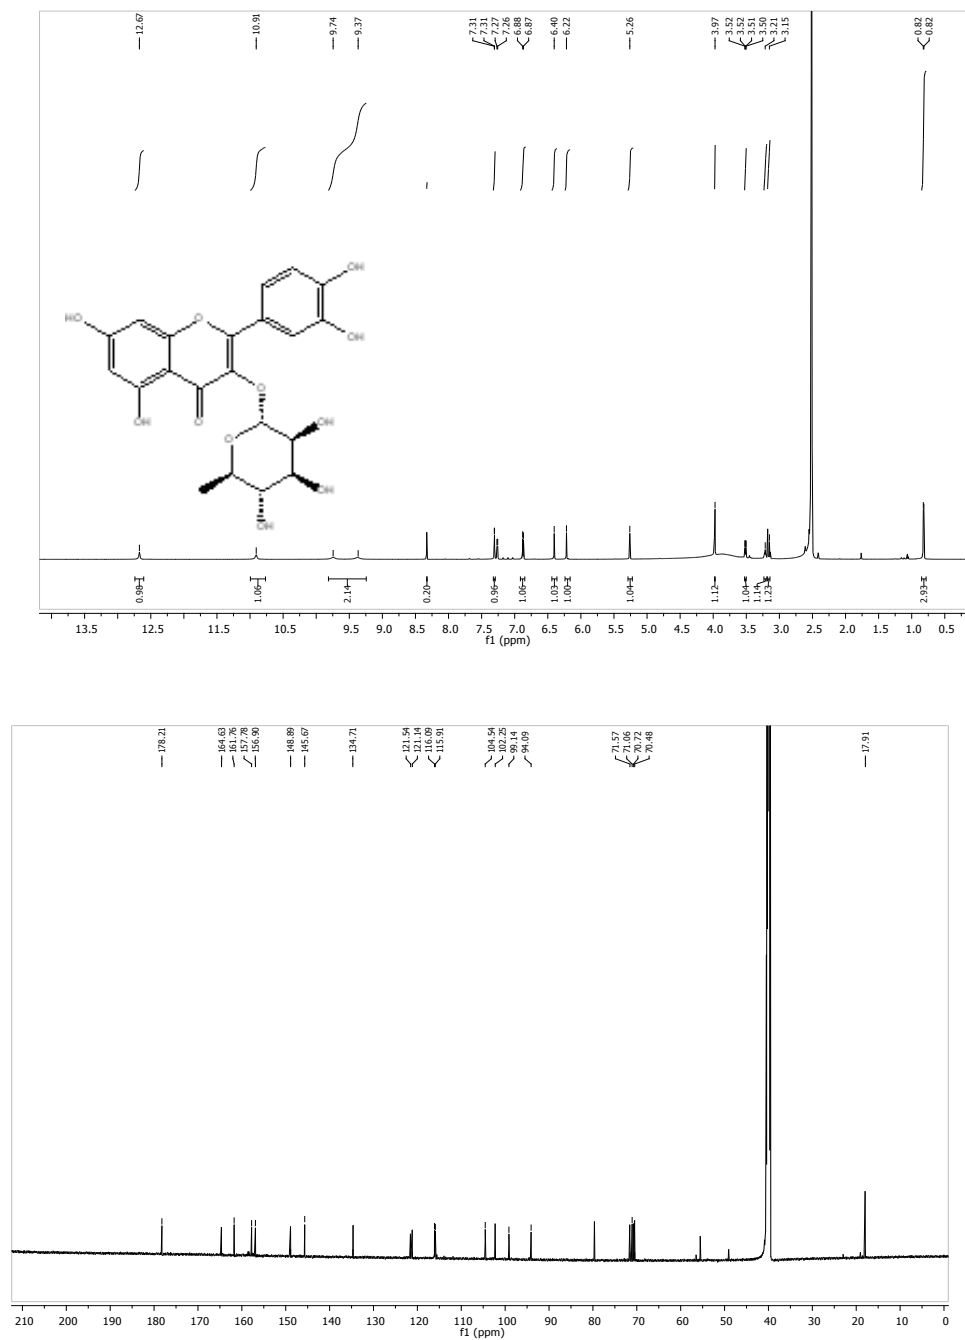

**Figure S2.** The <sup>1</sup>H NMR (700 MHz, DMSO-d<sub>6</sub>; upper panel) and <sup>13</sup>C NMR (175 MHz, DMSO-d<sub>6</sub>; lower panel) spectrum of *E. schimperi* derived quercetin 3-O-rhamnoside.

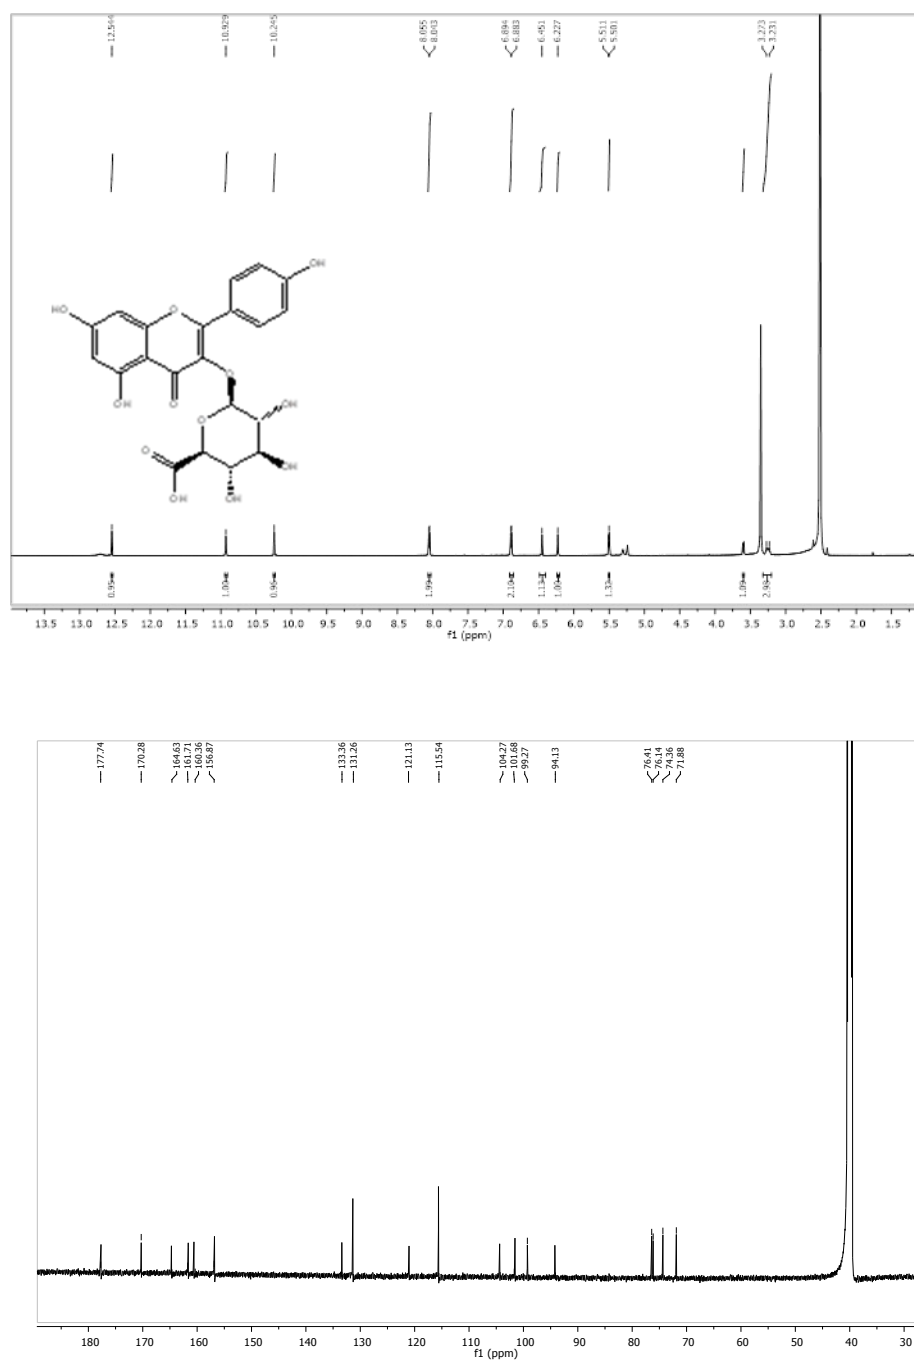

**Figure S3.** The <sup>1</sup>H NMR (700 MHz, DMSO-d<sub>6</sub>; upper panel) and <sup>13</sup>C NMR (175 MHz, DMSO-d<sub>6</sub>; lower panel) spectrum of *E. schimperi* derived kaempferol-3-*O*-glucuronide.

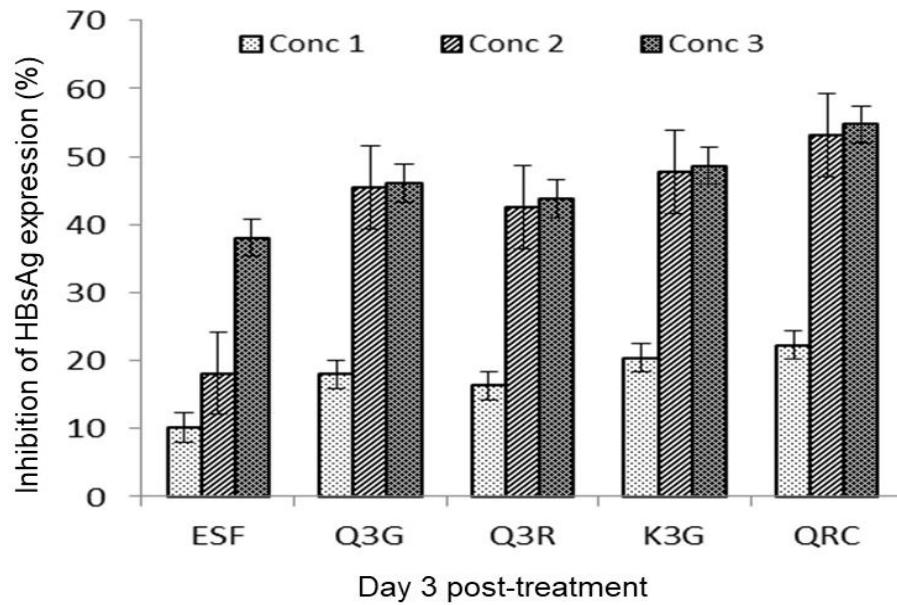

**Figure S4.** Dose-dependent inhibitory effect of *E. schemperi* fraction (ESF), quercetin-3-*O*-glucuronide (Q3G), quercetin-3-*O*-rhamnoside (Q3R) and kaempferol-3-*O*-glucuronide (K3G) on HBsAg expression at 48 h post-treatment. ESF (Conc 1: 25  $\mu$ g/ml; Conc 2: 50  $\mu$ g/ml; Conc 3: 100  $\mu$ g/ml). Q3G, Q3R and K3G (Conc 1: 6.25  $\mu$ g/ml; Conc 2: 12.5  $\mu$ g/ml; Conc 3: 25.0  $\mu$ g/ml). Quercetin (QRC; Conc 1: 6.25  $\mu$ g/ml; Conc 2: 12.5  $\mu$ g/ml; Conc 3: 25.0  $\mu$ g/ml) was used as positive control. Values on Y-axis are means of three determinations.

**Table S1.** Docking energies (kcal/mol) of the tested flavonols and standard drugs.

| <i>Ligands</i>                       | <i>Target</i> |          |
|--------------------------------------|---------------|----------|
|                                      | HBV-Pol/RT    | HBV-Core |
| Quercetin                            | -8.309        | -8.736   |
| Quercetin-3- <i>O</i> -glucuronide*  | -9.313        | -7.443   |
| Quercetin-3- <i>O</i> -rhamnoside*   | -6.493        | -9.001   |
| Kaempferol                           | -8.976        | -9.128   |
| Kaempferol-3- <i>O</i> -glucuronide* | -9.197        | -8.178   |
| Kaempferol-3- <i>O</i> -rhamnoside   | -9.382        | -8.212   |
| Lamudivine triphosphate              | -9.153        | -        |
| Heteroaryldihydropyrimidine          | -             | -8.876   |

\**E. schimperi* derived
